# Supplementary figures and images for: New Bicyclic Benzylidene Oxazole Pyrimidines: Synthesis, Docking, Dynamics, and Adsorption Studies on Fe(110) and Cu(111)
Source: Research Square preprint supplement (doi:10.21203/rs.3.rs-7113221/v1), 2025-07-22

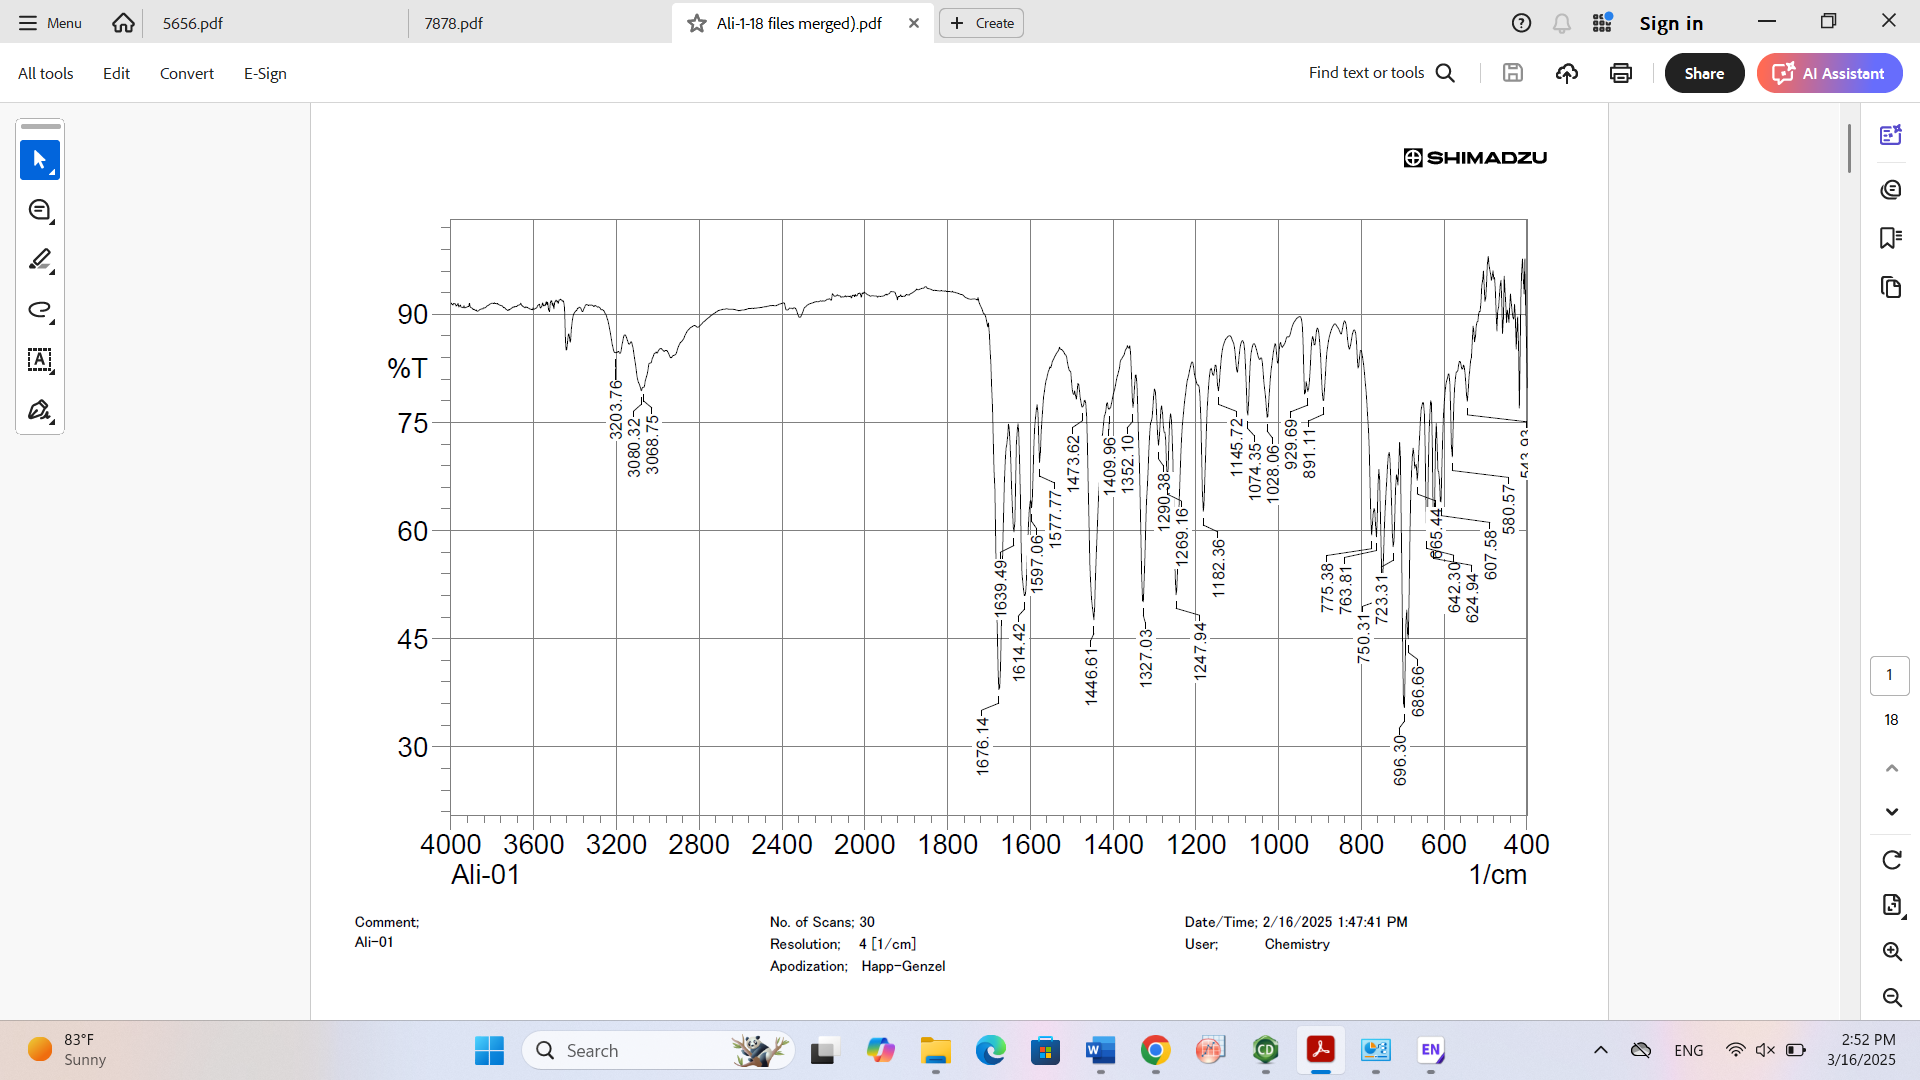


S1-FTIR-C1

S2-1H-NMR-C1

S3-13C-NMR-C1


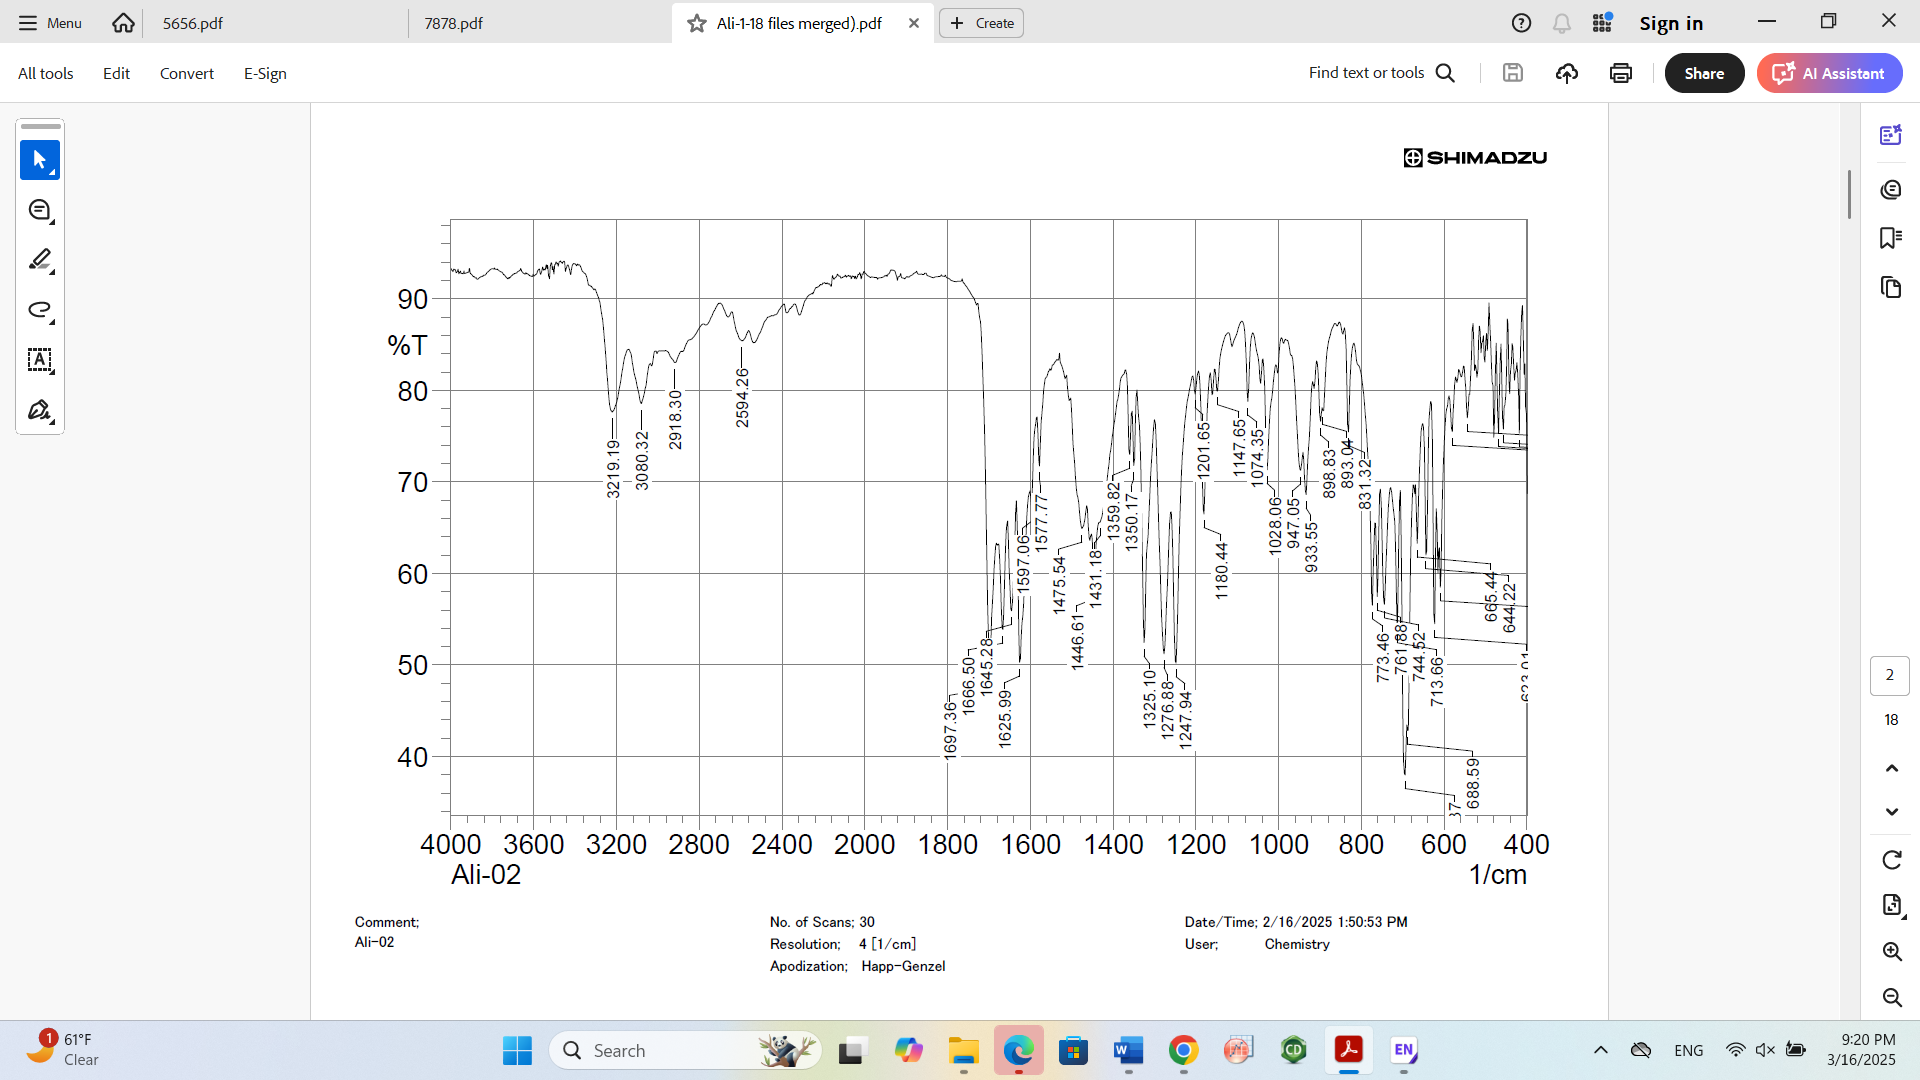


S4-FTIR-C2

S5-1H-NMR-C2

S6-13C-NMR-C2


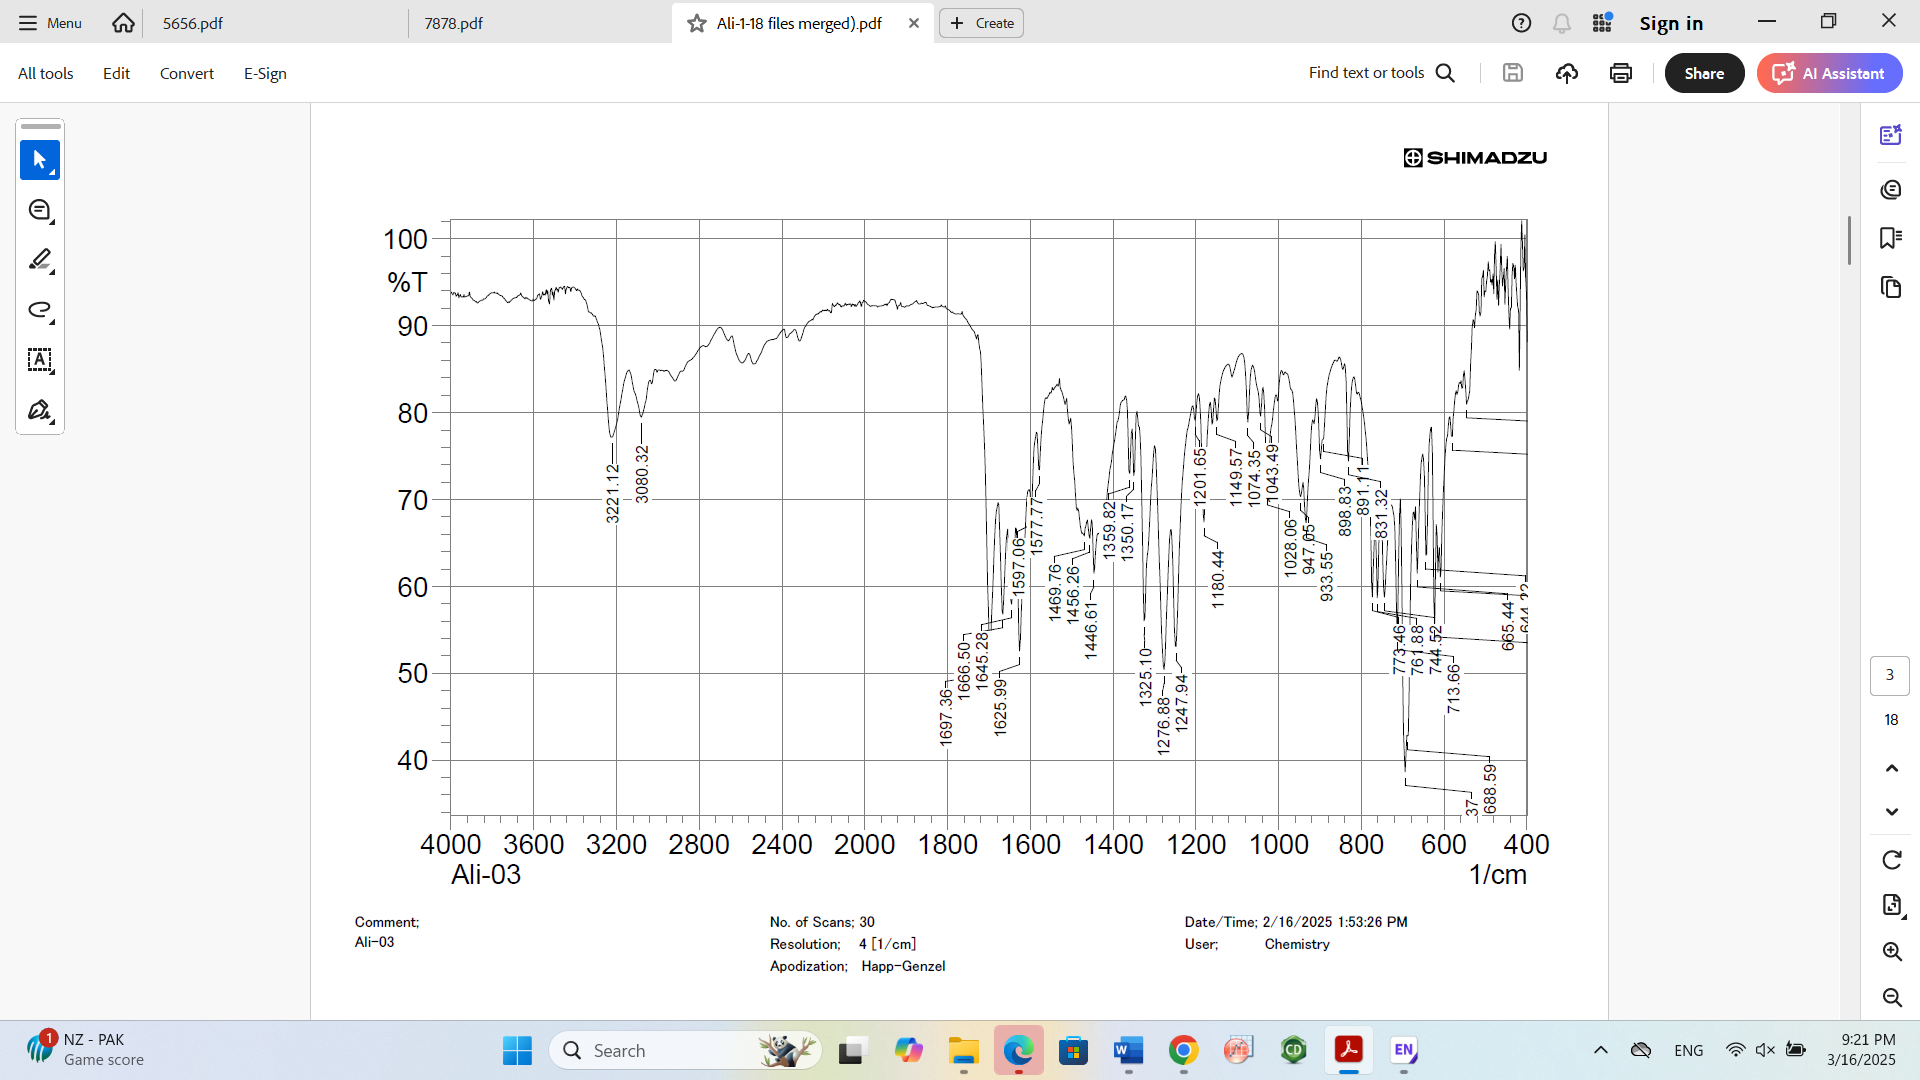


S7-FTIR-C3

S8-1H-NMR-C3

S9-13C-NMR-C3

Supplement: Supplementary file 1 [file 7701c4e78aa0f86bddcd629f.docx]
